# Supplementary material for: Efficacy Comparison of Tigecycline and Polymyxin B Against Carbapenem-Resistant Klebsiella Pneumoniae Infection in Intensive Care Units, a Multicenter Retrospective Study
Source: Research Square preprint supplement (doi:10.21203/rs.3.rs-1303820/v1), 2022-02-14
Supplement: Supplementary file 1 [file aca62e632b539784653e8aee.docx]

**Supplementary Table 1**  Comparison of characteristics of CRKP-infected patients undergoing 30-d mortality.

| Variable | Survived (n = 140) | Died (n = 96) | *P* |
| --- | --- | --- | --- |
| Male | 113 (80.7) | 73 (76.0) | 0.483 |
| Age (years) | 53.00 (40.00, 63.50) | 59.50 (46.00, 69.00) | 0.006* |
| **Infection site** |  |  |  |
| Abdomen | 49 (35.0) | 36 (37.5) | 0.799 |
| Only abdomen | 20 (14.3) | 14 (14.6) | 1.000 |
| Lung | 105 (75.0) | 66 (68.8) | 0.364 |
| Only lung | 58 (41.4) | 32 (33.3) | 0.262 |
| Blood | 37 (26.4) | 24 (25) | 0.924 |
| Only blood | 8 (5.7) | 7 (7.3) | 0.829 |
| Central nervous system | 2 (1.4) | 4 (4.2) | 0.227 |
| Urinary tract | 5 (3.6) | 1 (1.0) | 0.405 |
| Skin | 5 (3.6) | 2 (2.1) | 0.704 |
| Multiple sites | 52 (37.1) | 38 (39.6) | 0.808 |
| **Underlying disease** |  |  |  |
| Respiratory system | 13 (9.3) | 8 (8.3) | 0.984 |
| Cardiovascular | 46 (32.9) | 37 (38.5) | 0.447 |
| Kidney damage | 15 (10.7) | 14 (14.6) | 0.492 |
| Liver damage | 12 (8.6) | 15 (15.6) | 0.143 |
| Diabetes mellitus | 26 (18.6) | 16 (16.7) | 0.839 |
| Tumors | 7 (5.0) | 6 (6.2) | 0.902 |
| sCr (µmol/L) | 111.00 (72.00, 245.50) | 137.00 (75.00,232.75) | 0.509 |
| APACHE II score | 20.00 (14.00, 24.00) | 20.00 (15.00, 25.00) | 0.470 |
| SOFA score | 8.00 (4.00, 9.00) | 8 .00 (5.00, 10.00) | 0.213 |
| Mechanical ventilation | 114 (81.4) | 89 (92.7) | 0.024* |
| Vasoactive agents | 81 (57.9) | 85 (88.5) | < 0.001* |
| Duration of vasoactive agents (days) | 2 .00 (0.00, 6.25) | 7.00 (3.00, 13.25) | < 0.001* |
| Duration of mechanical ventilation (days) | 7.00 (1.00, 18.00) | 12.50(6.00, 21.25) | 0.004* |
| Septic shock | 59 (42.1) | 65 (67.7) | < 0.001* |
| **Therapy** |  |  |  |
| Treatment duration of TG (days) | 7.50 (3.00, 13.50) | 8.00 (0.00, 10.25) | 0.163 |
| Treatment duration of PB (days) | 5.00 (0.00, 11.00) | 6.00 (0.00, 11.00) | 0.292 |
| TG 50 mg, q12 h | 57 (40.7) | 35 (36.5) | 0.601 |
| TG 100 mg, q12 h | 48 (34.3) | 29 (30.2) | 0.607 |
| PB 50 mg, q1 2h | 42 (30.0) | 41 (42.7) | 0.062 |
| PB 75 mg, q12 h | 14 (10.0) | 4 (4.2) | 0.159 |
| PB 100 mg, q12 h | 17 (12.1) | 20 (20.8) | 0.105 |
| Total bacterial clearance | 45 (32.1) | 9 (9.4) | < 0.001* |
| CRKP clearance | 66 (47.1) | 21 (21.9) | < 0.001* |

sCr, Serum creatinine; *, significant differences.
